# Supplementary material
Source: PubMed Central journal article supplement (PMC7461660)

## Supplementary Index

### Table of Contents

1. Table S1: Baseline Characteristics of Hospitalized COVID(+) and COVID(-) Patients
2. Table S2: Incidence of AKI by ICU versus general floor admission and requirement of ICU and mechanical ventilation in COVID(+) and COVID(-) patients hospitalized during the study period
3. Table S3: Odds Ratio (OR) of AKI development in unadjusted and adjusted models
4. Table S4: Sub-Hazard Ratios (SHR) for Competing Risk of Death with AKI
5. Table S5: Hazard Ratio (HR) for Composite Outcome of Mortality or RRT in unadjusted and adjusted models
6. Table S6: Predictive model for Stage 2 or 3 AKI in COVID-19 infection
7. Table S7. Sensitivity analysis: AKI Incidence in Hospitalized Patients Using  $\geq 50\%$  Relative Increase in Serum Creatinine
8. Figure S1: Flowchart of AKI Incidence in COVID(+) patients admitted to the intensive care unit or general floor
9. Figure S2: Area under the receiver operating curve for predictive model for Stage 2 or 3 AKI

**Table S1. Baseline characteristics of Hospitalized COVID(+) Patients and COVID(-) Patients**

| n=4610                               | COVID(+) n=3345      |                               |                             | P value | COVID(-) n=1265      |                              |                            | P value |
|--------------------------------------|----------------------|-------------------------------|-----------------------------|---------|----------------------|------------------------------|----------------------------|---------|
|                                      | Total                | with AKI<br>n=1903<br>(56.9%) | no AKI<br>n=1442<br>(43.1%) |         | Total                | with AKI<br>n=471<br>(37.2%) | no AKI<br>n=794<br>(62.8%) |         |
| <b>Socio-demographic Data, n(%)</b>  |                      |                               |                             |         |                      |                              |                            |         |
| Age, yrs, mean (SD)                  | 64.4(16.4)           | 67.1(15.3)                    | 60.7(17.0)                  | <0.001  | 58.5(19.1)           | 64.7(16.2)                   | 54.8(19.7)                 | <0.001  |
| Age decile, yrs                      |                      |                               |                             |         |                      |                              |                            |         |
| <30                                  | 113(3.4)             | 42(2.2)                       | 71(4.9)                     | <0.001  | 113(8.9)             | 17(3.6)                      | 96(12.1)                   | <0.001  |
| 31-40                                | 189(5.6)             | 69(3.6)                       | 120(8.3)                    |         | 161(4.0)             | 27(5.7)                      | 134(16.9)                  |         |
| 41-50                                | 311(9.3)             | 135(7.1)                      | 176(12.2)                   |         | 107(8.5)             | 25(5.3)                      | 82(10.3)                   |         |
| 51-60                                | 553(16.5)            | 286(15.0)                     | 267(18.5)                   |         | 212(16.8)            | 87(18.5)                     | 125(15.7)                  |         |
| 61-70                                | 779(23.3)            | 436(22.9)                     | 343(23.8)                   |         | 269(21.3)            | 123(26.1)                    | 146(18.4)                  |         |
| 71-80                                | 771(23.0)            | 513(27.0)                     | 258(17.9)                   |         | 231(18.3)            | 111(23.6)                    | 120(15.1)                  |         |
| >80                                  | 629(18.8)            | 422(22.2)                     | 207(14.4)                   |         | 64(13.6)             | 81(17.2)                     | 91(11.5)                   |         |
| Sex                                  |                      |                               |                             |         |                      |                              |                            |         |
| Female                               | 1569(46.9)           | 812(42.7)                     | 757(52.5)                   | <0.001  | 656(51.9)            | 207(44.0)                    | 449(56.6)                  | <0.01   |
| Male                                 | 1776(53.1)           | 1091(57.3)                    | 685(47.5)                   |         | 609(48.1)            | 264(56.0)                    | 345(43.5)                  |         |
| Race/ethnicity                       |                      |                               |                             |         |                      |                              |                            |         |
| Non-Hispanic White                   | 275(8.2)             | 155(8.2)                      | 120(8.3)                    | <0.001  | 140(11.1)            | 45(9.6)                      | 95(12.0)                   | 0.1     |
| Non-Hispanic Black                   | 1201(35.9)           | 771(40.5)                     | 430(29.8)                   |         | 480(37.9)            | 198(42.0)                    | 282(35.5)                  |         |
| Hispanic                             | 1247(37.3)           | 638(33.5)                     | 609(42.2)                   |         | 449(35.5)            | 162(34.4)                    | 287(36.2)                  |         |
| Other                                | 622(18.6)            | 339(17.8)                     | 283(19.6)                   |         | 196(15.5)            | 66(14.0)                     | 130(16.4)                  |         |
| NH Resident                          | 548(16.4)            | 399(21.0)                     | 149(10.3)                   | <0.001  | 141(11.2)            | 78(16.6)                     | 63(7.9)                    | <0.001  |
| SES<br>n=3680<br>median (IQR)        | -2.2<br>[-5.3(-1.1)] | -2.1<br>[-4.9(-1.0)]          | -2.4<br>[-5.7(-1.1)]        | 0.03    | -2.3<br>[-5.3(-1.0)] | -2.3<br>[-5.8(-1.0)]         | -2.3<br>[-5.1(-1.0)]       | 0.6     |
| <b>Clinical comorbidities, n(%)</b>  |                      |                               |                             |         |                      |                              |                            |         |
| BMI (k/m <sup>2</sup> )<br>n=4367    |                      |                               |                             |         |                      |                              |                            |         |
| <30                                  | 1797(57.1)           | 1069(59.6)                    | 728(53.8)                   | 0.005   | 772(63.3)            | 304(67.0)                    | 368(61.2)                  | 0.01    |
| 30-35                                | 725(23.0)            | 388(21.6)                     | 337(24.9)                   |         | 231(19.0)            | 89(19.6)                     | 142(18.6)                  |         |
| >35                                  | 626(19.9)            | 338(18.8)                     | 288(21.3)                   |         | 216(17.7)            | 61(13.4)                     | 155(20.3)                  |         |
| DM                                   | 906(27.1)            | 569(29.9)                     | 337(23.4)                   | <0.001  | 310(24.5)            | 156(33.1)                    | 154(19.4)                  | <0.001  |
| CKD                                  | 409(12.2)            | 287(15.1)                     | 122(8.5)                    | <0.001  | 217(17.2)            | 117(24.8)                    | 100(12.6)                  | <0.001  |
| CHF                                  | 129(3.9)             | 87(4.6)                       | 42(2.9)                     | 0.01    | 130(10.3)            | 72(15.3)                     | 58(7.3)                    | <0.001  |
| Lung disease                         | 163(4.9)             | 88(4.6)                       | 75(5.2)                     | 0.4     | 167(13.2)            | 73(15.5)                     | 94(11.8)                   | 0.1     |
| HIV/AIDS                             | 7(0.2)               | 3(0.2)                        | 4(0.3)                      | 0.4     | 16(1.3)              | 7(1.5)                       | 9(1.1)                     | 0.6     |
| Malignancy                           | 61(1.8)              | 38(2.0)                       | 23(37.7)                    | 0.4     | 59(4.7)              | 24(5.1)                      | 35(4.4)                    | 0.6     |
| Rheumatologic                        | 15(0.4)              | 8(0.4)                        | 7(0.5)                      | 0.8     | 12(1.0)              | 5(1.1)                       | 7(0.9)                     | 0.8     |
| Charlson Comorbidity Index           |                      |                               |                             |         |                      |                              |                            |         |
| 0-1                                  | 1094(32.7)           | 495(26.0)                     | 599(41.5)                   | <0.001  | 499(39.4)            | 118(25.0)                    | 381(48.0)                  | <0.001  |
| 1-5                                  | 1993(59.6)           | 1237(65.0)                    | 756(52.4)                   |         | 568(44.9)            | 247(52.4)                    | 321(40.4)                  |         |
| >5                                   | 258(7.7)             | 171(9.0)                      | 87(6.0)                     |         | 198(15.7)            | 106(22.5)                    | 92(1.6)                    |         |
| Outpatient visit within 1-year prior | 2453(73.3)           | 1376(72.3)                    | 1077(74.7)                  | 0.1     | 977(77.2)            | 351(74.5)                    | 626(78.8)                  | 0.1     |

|                                              |                       |                      |                     |        |                     |                     |                     |        |
|----------------------------------------------|-----------------------|----------------------|---------------------|--------|---------------------|---------------------|---------------------|--------|
| Pre-hospital ACEi or ARB use                 | 310(9.3)              | 195(10.2)            | 115(8.0)            | 0.02   | 209(16.5)           | 87(18.5)            | 122(15.4)           | 0.2    |
| <b>Initial vital signs, mean (SD)</b>        |                       |                      |                     |        |                     |                     |                     |        |
| Temperature n=4598 (degrees Fahrenheit)      | 99.2(1.6)             | 99.3(1.6)            | 99.2(1.5)           | 0.6    | 98.5(1.3)           | 98.5(1.5)           | 98.4(1.1)           | 1.0    |
| Respiratory rate n=4599 (breaths/min)        | 21.6(6.3)             | 22.3(6.8)            | 20.6(5.4)           | <0.001 | 20.1(4.9)           | 20.9(5.2)           | 19.7(4.6)           | <0.001 |
| Pulse ox n=4601 (%)                          | 92.8(8.0)             | 91.7(9.4)            | 94.3(5.4)           | <0.001 | 96.4(5.3)           | 95.3(7.2)           | 97.1(3.7)           | <0.001 |
| Pulse rate n=4601 (beats/min)                | 98.3(20.4)            | 99.1(21.3)           | 97.2(19.3)          | 0.01   | 95.3(21.8)          | 98.5(23.0)          | 93.4(92.0)          | 0.001  |
| <b>Initial laboratory data</b>               |                       |                      |                     |        |                     |                     |                     |        |
| WBC (k/ $\mu$ L) n=4602 mean (SD)            | 8.7(7.0)              | 9.3(6.9)             | 7.8(7.1)            | <0.001 | 11.1(16.3)          | 12.2(9.3)           | 10.4(19.2)          | 0.03   |
| Lymphocyte (k/ $\mu$ L) n=4602 mean (SD)     | 1.3(4.8)              | 1.2(3.7)             | 1.4(5.8)            | 0.4    | 1.6(2.2)            | 1.6(3.1)            | 1.7(1.5)            | 0.6    |
| Neutrophil (k/ $\mu$ L) n=4602 mean (SD)     | 6.7(4.0)              | 7.3(4.2)             | 5.8(3.5)            | <0.001 | 8.1(6.0)            | 9.4(6.2)            | 7.3(5.7)            | 0.05   |
| Neutrophil/Lymphocyte ratio median (IQR)     | 5.7 (3.5-9.3)         | 6.6 (4.1-10.4)       | 4.7 (3.0-7.7)       | <0.001 | 4.8 (2.8-8.9)       | 6.6 (3.5-11.7)      | 4.1 (2.5-6.9)       | <0.001 |
| Platelets (k/ $\mu$ L) n=4602 mean (SD)      | 230.6 (101.5)         | 228.3 (102.4)        | 233.6 (100.2)       | 0.1    | 254.3 (109.1)       | 253.5 (115.3)       | 254.8 (105.2)       | 0.8    |
| INR, mean (SD) <1.1 >1.1                     | 1215(36.3) 2130(63.7) | 602(31.6) 1301(68.4) | 613(42.5) 829(57.5) | <0.001 | 348(27.5) 917(72.5) | 101(21.4) 370(78.6) | 247(31.1) 547(68.9) | <0.001 |
| Fibrinogen(mg/dL) n=2297 mean (SD)           | 649.0 (200.0)         | 659.1 (210.9)        | 631.8 (177.8)       | 0.002  | 532.7 (218.6)       | 547.7 (239.8)       | 517.8 (194.8)       | 0.2    |
| CRP (mg/dL) n=3429 median (IQR)              | 10.8 (4.8-19.1)       | 13.2 (6.1-22.4)      | 7.3 (3.3-14.3)      | <0.001 | 4.3 (0.9-13.8)      | 6.2 (1.7-18.7)      | 2.6 (0.5-10.4)      | <0.001 |
| Ferritin (ng/mL) n=2470 median (IQR)         | 763 (384-1420)        | 911 (491-1668)       | 610 (296-1087)      | <0.001 | 320 (107-856)       | 369 (167-1085)      | 230 (82-664)        | <0.001 |
| PTT (seconds) median (IQR)                   | 32.6 (29.6-36.6)      | 32.9 (29.8-37.1)     | 32.3 (29.3-35.9)    | <0.001 | 30.8 (27.6-35.1)    | 31.4 (27.8-35.6)    | 30.5 (27.4-34.2)    | 0.02   |
| D-dimer ( $\mu$ g/mL) n=2726 median (IQR)    | 1.7 (0.9-3.8)         | 2.2 (1.1-6.2)        | 1.1 (0.7-2.3)       | <0.001 | 1.7 (0.7-4.0)       | 2.8 (1.2-7.0)       | 1.2 (0.5-2.5)       | 0.01   |
| LDH (U/L) n=3715 median (IQR)                | 403 (300-546)         | 458 (336-637)        | 350 (270-451)       | <0.001 | 280 (215-397)       | 338.5 (251-504)     | 248 (201-335)       | <0.001 |
| Total bilirubin (mg/dL) n=4472 median (IQR)  | 0.5 (0.3-0.7)         | 0.5 (0.3-0.7)        | 0.5 (0.3-0.6)       | <0.001 | 0.5 (0.3-0.7)       | 0.5 (0.3-0.8)       | 0.4 (0.3-0.7)       | <0.001 |
| Direct Bilirubin (mg/dL) n=4479 median (IQR) | 0.2 (0.2-0.3)         | 0.2 (0.2-0.3)        | 0.2 (0.2-0.2)       | 0.001  | 0.2 (0.2-0.2)       | 0.2 (0.2-0.3)       | 0.2 (0.2-0.2)       | <0.001 |

|                                                     |                  |                  |                  |        |                  |                  |                  |        |
|-----------------------------------------------------|------------------|------------------|------------------|--------|------------------|------------------|------------------|--------|
| Procalcitonin<br>n=2185<br>median (IQR)             | 0.2<br>(0.1-0.7) | 0.4<br>(0.1-1.3) | 0.2<br>(0.1-0.2) | <0.001 | 0.1<br>(0.1-0.7) | 0.3<br>(0.1-1.9) | 0.1<br>(0.1-0.1) | <0.001 |
| Proteinuria, n(%)<br>n=2590                         |                  |                  |                  |        |                  |                  |                  |        |
| <30 mg                                              | 14(0.8) *        | 5(0.4)           | 7(1.4)           |        | 154(12.2)        | 73(21.5)         | 81(19.6)         |        |
| 30-500 mg                                           | 1761(95.9)       | 1128(95.0)       | 633(97.5)        | <0.001 | 513(40.6)        | 222(65.3)        | 291(70.5)        | 0.2    |
| >500 mg                                             | 62(3.4)          | 55(4.6)          | 9(1.1)           |        | 86(6.8)          | 45(13.2)         | 41(9.9)          |        |
| <b>Need for ICU or mechanical ventilation, n(%)</b> |                  |                  |                  |        |                  |                  |                  |        |
| Mechanical<br>Ventilation                           | 624(17.6)        | 569(29.9)        | 55(3.8)          | <0.001 | 126(10.0)        | 90(19.1)         | 36(4.5)          | <0.001 |
| ICU Admission<br>n=4603                             | 438(13.1)        | 382(20.1)        | 56(3.9)          | <0.001 | 46(3.6)          | 30(6.4)          | 16(2.0)          | <0.001 |

SES, socioeconomic status; BMI, body mass index; DM, diabetes mellitus; CKD, chronic kidney disease; CHF, congestive heart failure; ACEI, angiotensin inhibitor; ARB, angiotensin receptor blocker; WBC, white blood cell count; INR, international normalized ratio; CRP, c-reactive protein; PTT, prolonged prothrombin time; LDH, lactate dehydrogenase; ICU, intensive care unit  
\*percentages are of the total tested for proteinuria

**Table S2. Incidence of AKI by ICU or general floor admission and requirement of ICU and mechanical ventilation in COVID(+) and COVID(-) patients with and without AKI**

|                                | COVID(+) n=3345 |               | COVID(-) n=1265 |              |
|--------------------------------|-----------------|---------------|-----------------|--------------|
|                                | AKI n=1903      | No AKI n=1442 | AKI n=471       | No AKI n=794 |
| <b>General floor admission</b> | 1521 (79.9)     | 1386 (96.1)   | 441 (93.6)      | 778 (98.0)   |
| <b>ICU Admission</b>           | 382 (20.1)      | 56 (3.9)      | 30 (6.4)        | 16 (2.0)     |
| <b>RRT</b>                     | 164 (8.6)       |               | 20 (4.2)        |              |
| <b>Mechanical ventilation</b>  | 569 (29.9)      | 55 (3.8)      | 90 (19.1)       | 36 (4.5)     |
| <b>In-hospital death</b>       | 641 (33.7)      | 124 (9.3)     | 63 (13.4)       | 29 (3.7)     |

\*ICU, intensive care unit

**Table S3. Odds Ratio (OR) of AKI development in unadjusted and adjusted models**

|                                    |                    | Odds Ratio for AKI   |                      |                      |
|------------------------------------|--------------------|----------------------|----------------------|----------------------|
|                                    |                    | Model 1 <sup>1</sup> | Model 2 <sup>2</sup> | Model 3 <sup>3</sup> |
| <b>Sex</b> <sup>4</sup>            | COVID(+) n=3345    |                      |                      |                      |
|                                    | Female             | 1                    | 1                    | 1                    |
|                                    | Male               | 1.5(1.3-1.7)         | 1.6(1.4-1.8)         | 1.5(1.2-1.9)         |
|                                    | COVID (-) n=1265   |                      |                      |                      |
|                                    | Female             | 1                    | 1                    | 1                    |
|                                    | Male               | 1.7(1.3-2.1)         | 1.7(1.3-2.1)         | 1.6(1.1-2.3)         |
| <b>Race/Ethnicity</b> <sup>5</sup> | COVID(+)           |                      |                      |                      |
|                                    | Non-hispanic White | 1                    | 1                    | 1                    |
|                                    | Non-hispanic Black | 1.4(1.1-1.8)         | 1.7(1.3-2.3)         | 1.8(1.2-2.7)         |
|                                    | Hispanic           | 0.8(0.6-1.0)         | 1.0(0.8-1.4)         | 1.1(0.8-1.7)         |
|                                    | Other              | 0.9(0.7-1.2)         | 1.1(0.8-1.5)         | 1.1(0.7-1.7)         |
|                                    | COVID(-)           |                      |                      |                      |
|                                    | Non-hispanic White | 1                    | 1                    | 1                    |
|                                    | Non-hispanic Black | 1.5(1.0-2.2)         | 1.9(1.2-2.8)         | 2.2(1.1-4.3)         |
|                                    | Hispanic           | 1.2(0.8-1.8)         | 1.6(1.0-2.4)         | 1.6(0.8-3.3)         |
|                                    | Other              | 1.1(0.7-1.7)         | 1.4(0.8-2.2)         | 1.4(0.6-3.2)         |
| <b>Age decile</b> <sup>6</sup>     | COVID(+)           |                      |                      |                      |
|                                    | <30                | 1                    | 1                    | 1                    |
|                                    | 31-40              | 1.0(0.6-1.6)         | 0.9(0.6-1.5)         | 1.4(0.6-3.0)         |
|                                    | 41-50              | 1.3(0.8-2.0)         | 1.2(0.8-1.8)         | 1.8(0.9-3.6)         |
|                                    | 51-60              | 1.8(1.2-2.7)         | 1.6(1.1-2.5)         | 1.8(0.9-3.6)         |
|                                    | 61-70              | 2.1(1.4-3.2)         | 1.8(1.2-2.8)         | 2.2(1.1-4.2)         |
|                                    | 71-80              | 3.4(2.2-5.1)         | 2.7(1.7-4.3)         | 2.9(1.5-5.6)         |
|                                    | >80                | 3.5(2.3-5.2)         | 2.9(1.8-4.7)         | 2.8(1.4-5.7)         |
|                                    | COVID(-)           |                      |                      |                      |
|                                    | <30                | 1                    | 1                    | 1                    |
|                                    | 31-40              | 1.1(0.6-2.2)         | 1.1(0.6-2.2)         | 1.6(0.6-4.8)         |
|                                    | 41-50              | 1.7(0.9-3.4)         | 1.4(0.7-2.8)         | 1.5(0.5-4.8)         |
|                                    | 51-60              | 3.9(2.2-7.0)         | 2.8(1.5-2.8)         | 2.5(0.9-4.8)         |
|                                    | 61-70              | 4.8(3.7-8.4)         | 3.5(1.9-6.3)         | 3.1(1.2-8.2)         |
|                                    | 71-80              | 5.2(2.9-9.3)         | 3.3(1.7-6.2)         | 3.4(1.3-9.3)         |
|                                    | >80                | 5.0(2.8-9.1)         | 3.1(1.6-6.1)         | 3.2(1.2-9.1)         |

1 Unadjusted

2 Model 1+ Adjusted for clinical comorbidities: Diabetes mellitus, Chronic kidney disease, Charlson comorbidity index, Congestive heart failure, pre-hospitalization ACEi or ARB, Nursing home resident

3 Model 2+ adjusted for SES and crowding

4 Adjusted for age & race/ethnicity in Models 2 and 3

5 Adjusted for sex & age in Models 2 and 3

6 Adjusted for sex & race/ethnicity in Models 2 and 3

**Table S4. Sub-Hazard Ratios (SHR) for Competing Risk of AKI and Death**

|                                         | <b>Unadjusted SHR</b> | <b>Adjusted SHR<sup>1</sup></b> |
|-----------------------------------------|-----------------------|---------------------------------|
| <b>Sex</b>                              |                       |                                 |
| Female                                  | 1                     | 1                               |
| Male                                    | 1.2 (1.1-1.3)         | 1.2 (1.1-1.3)                   |
| <b>Race/ethnicity</b>                   | 1                     |                                 |
| Non-Hispanic White                      | 1.4 (1.2-1.7)         | 1                               |
| Non-Hispanic Black                      | 1.0 (0.9-1.2)         | 1.5 (1.2-1.7)                   |
| Hispanic                                | 1.1 (0.9-1.3)         | 1.1 (0.9-1.3)                   |
| Other                                   |                       | 1.1 (0.9-1.3)                   |
| <b>Age (for every 10 year increase)</b> |                       |                                 |
|                                         | 1.1 (1.0-1.1)         | 1.1 (1.0-1.1)                   |

*1 Adjusted for clinical comorbidities: Diabetes mellitus, Chronic kidney disease, Charlson comorbidity index, Congestive heart failure, pre-hospitalization ACEi or ARB, Nursing home resident*

**Table S5. Hazard Ratio (HR) for Composite Outcome of Mortality or RRT in unadjusted and adjusted models**

| <b>COVID(+) n=3445</b> | <b>Unadjusted HR<br/>n=3345</b> | <b>Adjusted HR<sup>1</sup><br/>n=3345</b> | <b>Adjusted HR<sup>2</sup><br/>n=2367</b> |
|------------------------|---------------------------------|-------------------------------------------|-------------------------------------------|
| <b>Sex</b>             |                                 |                                           |                                           |
| Female                 | 1                               | 1                                         | 1                                         |
| Male                   | 1.2(1.1-1.3)                    | 1.3(1.2-1.5)                              | 1.3(1.1-1.6)                              |
| <b>Race/Ethnicity</b>  |                                 |                                           |                                           |
| Non-hispanic white     | 1                               | 1                                         | 1                                         |
| Non-hispanic Black     | 0.8(0.6-1.0)                    | 0.9(0.7-1.2)                              | 1.0(0.7-1.4)                              |
| Hispanic               | 0.7(0.6-0.9)                    | 0.9(0.7-1.2)                              | 1.1(0.8-1.6)                              |
| Other                  | 0.7(0.6-1.0)                    | 1.0(0.8-1.3)                              | 1.0(0.7-1.5)                              |
| <b>Age decile</b>      |                                 |                                           |                                           |
| <30                    | 1                               | 1                                         | 1                                         |
| 31-40                  | 1.2(0.4-3.4)                    | 1.2(0.4-3.4)                              | 2.7(0.3-24.4)                             |
| 41-50                  | 1.7(0.6-4.3)                    | 1.6(0.6-4.2)                              | 5.1(0.7-39.1)                             |
| 51-60                  | 3.5(1.4-8.6)                    | 3.1(1.2-7.5)                              | 6.7(0.9-49.1)                             |
| 61-70                  | 5.4(2.2-13.2)                   | 4.4(1.8-10.7)                             | 9.9(1.4-71.6)                             |
| 71-80                  | 9.2(3.8-22.2)                   | 6.6(2.7-16.3)                             | 15.3(2.1-110.4)                           |
| >80                    | 11.2(4.6-27.3)                  | 7.6(3.1-18.9)                             | 19.5(2.7-141.2)                           |

*1 Adjusted for clinical comorbidities: Diabetes mellitus, Chronic kidney disease, Charlson comorbidity index, Congestive heart failure, pre-hospitalization ACEi or ARB, Nursing home resident*

*2 Further adjustment for SES and % of household with >1.5 occupants per room*



**Table S6. Predictive Model for Stage 2 or 3 AKI in COVID-19 Infection**

| <b>Variable</b>                                           | <b>Odds Ratio, 95% CI</b> |
|-----------------------------------------------------------|---------------------------|
| Age for every 1 year increase                             | 1.0 (1.0-1.0)             |
| Black race                                                | 1.8 (1.2-2.8)             |
| Male sex                                                  | 1.4 (1.1-1.7)             |
| Diabetes mellitus                                         | 1.3 (1.0-1.7)             |
| Nursing home resident                                     | 1.6 (1.2-2.1)             |
| Respiratory rate for every increase in breath per minute* | 1.0 (1.0-1.0)             |
| WBC count (for every k/ $\mu$ L)                          | 1.0 (1.0-1.1)             |
| <sup>1</sup> Neutrophil/lymphocyte ratio*                 | 1.5 (1.2-1.9)             |
| <sup>2</sup> Lactate dehydrogenase*                       | 2.1 (1.8-2.5)             |

*\*Initial value on hospitalization*

*1 Each increase in category: <3 k/ $\mu$ L, 3-13.9 k/ $\mu$ L, >13.9 k/ $\mu$ L*

*2 Each increase in category: <300 U/L, 300-599 U/L, >600 U/L*

*The area under the precision-recall curves for WBC, respiratory rate, neutrophil/lymphocyte ratio in tertiles, LDH in tertiles as compared to sex as a classifier are 0.54, 0.55, 0.52, 0.44, respectively*

**Table S7. Sensitivity Analysis: AKI Incidence in Hospitalized COVID(+) Patients Using  $\geq$  50% Relative Increase in Serum Creatinine**

| n (%)         | COVID(+) n=3345 | COVID(-) n=1265 | Historical cohort n=9859 |
|---------------|-----------------|-----------------|--------------------------|
| AKI incidence | 1574 (47.1)     | 354 (28)        | 1528 (15.5)              |

**Figure S1. Flowchart of AKI Incidence in COVID(+) patients admitted to the intensive care unit or general medical floor**

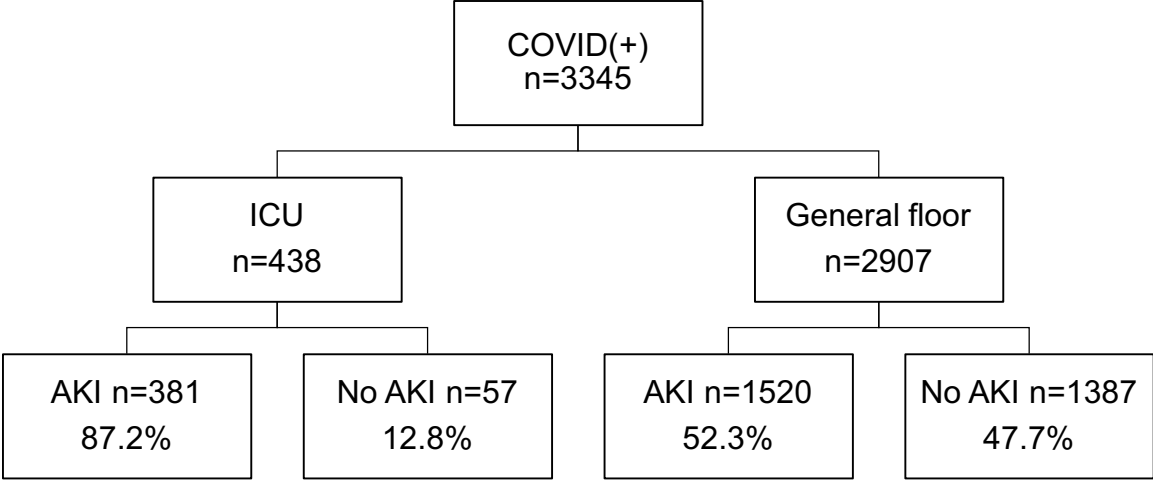

*\*ICU= both conventional and non-conventional ICU*

Figure S2. Area under the receiver operating curve for predictive model

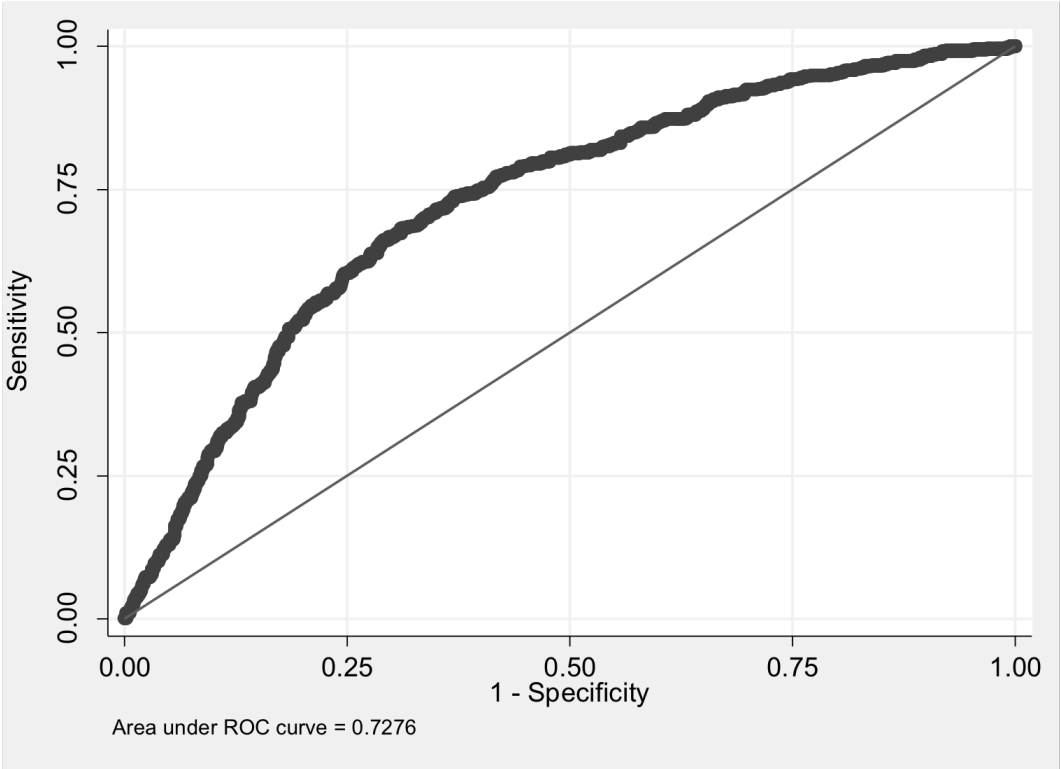

Supplement: ASN.2020040509SupplementaryData.pdf [file ASN.2020040509SupplementaryData.pdf]
